# Supplementary material for: Miniscule differences between sex chromosomes in the giant genome of a salamander
Source: PubMed Central journal article supplement (PMC6294749; doi:10.1038/s41598-018-36209-2), 2018-12-14
Supplement: 41598_2018_36209_MOESM1_ESM.pdf [file 41598_2018_36209_MOESM1_ESM.pdf]

## Miniscule differences between sex chromosomes in the giant genome of a salamander

Melissa C. Keinath<sup>1,2\*</sup>, Nataliya Timoshevskaya<sup>1</sup>, Vladimir A. Timoshevskiy<sup>1</sup>, S. Randal Voss<sup>3</sup>, Jeremiah J. Smith<sup>1\*</sup>

<sup>1</sup> - Department of Biology, University of Kentucky, Lexington, KY, USA.

<sup>2</sup> - Department of Embryology, Carnegie Institution for Science, Baltimore, MD, USA.

<sup>3</sup> - Department of Neuroscience, Spinal Cord & Brain Injury Research Center (SCoBIRC), & Ambystoma Genetic Stock Center, University of Kentucky, Lexington, KY, USA.

\* - Communicating Authors

## SUPPLEMENTARY FIGURES

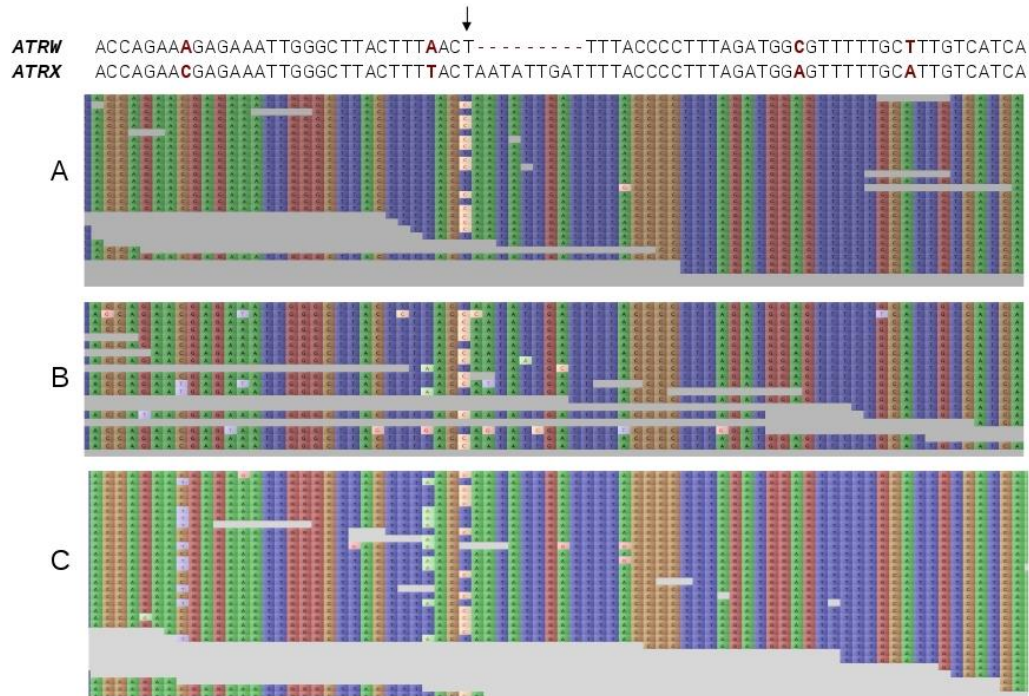

### Supplementary Figure 1. Two alleles detected for *ATRX* in axolotl.

Two alleles can be observed in exon 9 of *ATRX* within the region homologous to the validated sex-specific DNA fragment of *ATRW* (SuperContig\_990642). Alignment of short reads from genome sequencing of **A**) an *A. mexicanum* female, **B**) 22 female individuals, **C**) and 26 males to positions 6590-6665 of SuperContig\_546209 (the contig containing exon 9 of the *ATRX* gene in the female genome assembly). The position marked with an arrow corresponds to position 1018 of SuperContig\_990642 and position 6620 of SuperContig\_546209. Visualization of the alignment produced using Tablet 1.14 <sup>92</sup>.

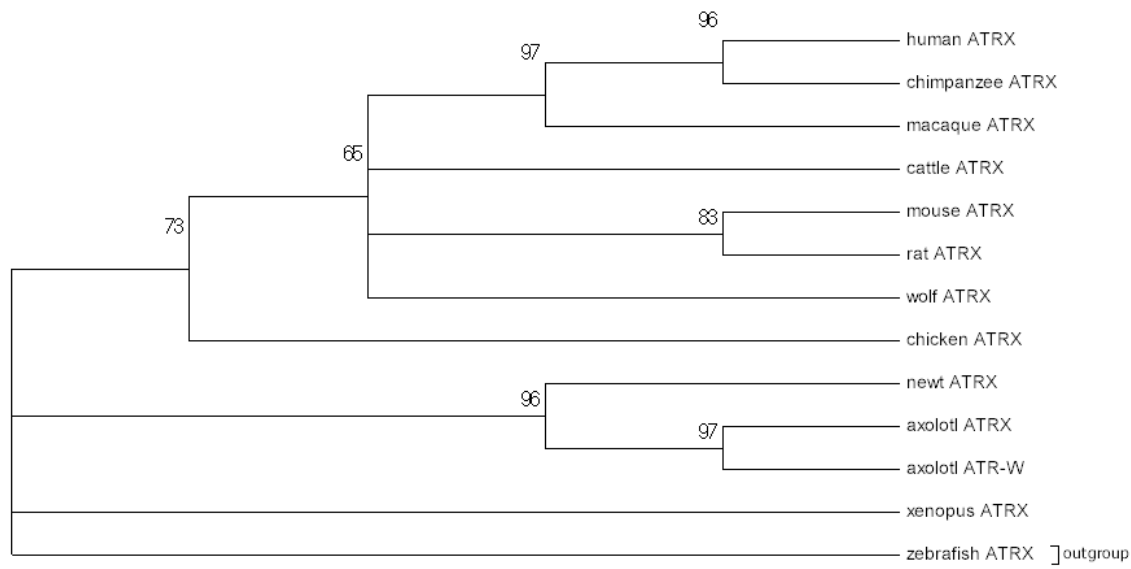

### Supplementary Figure 2. Neighbor-Joining tree with bootstraps for vertebrate *ATRX*.

The evolutionary history was inferred using the Neighbor-Joining method<sup>87</sup>. The bootstrap consensus tree inferred from 10000 replicates is taken to represent the evolutionary history of the taxa analyzed<sup>88</sup>. Branches corresponding to partitions reproduced in less than 50% bootstrap replicates are collapsed. The percentage of replicate trees in which the associated taxa clustered together in the bootstrap test (10000 replicates) are shown next to the branches<sup>88</sup>. The evolutionary distances were computed using the Maximum Composite Likelihood method<sup>89</sup> and are in the units of the number of base substitutions per site. The analysis involved 13 nucleotide sequences. Codon positions included were 1st+2nd+3rd+Noncoding. All positions containing gaps and missing data were eliminated. There was a total of 251 positions in the final dataset. Evolutionary analyses were conducted in MEGA7<sup>84</sup>.

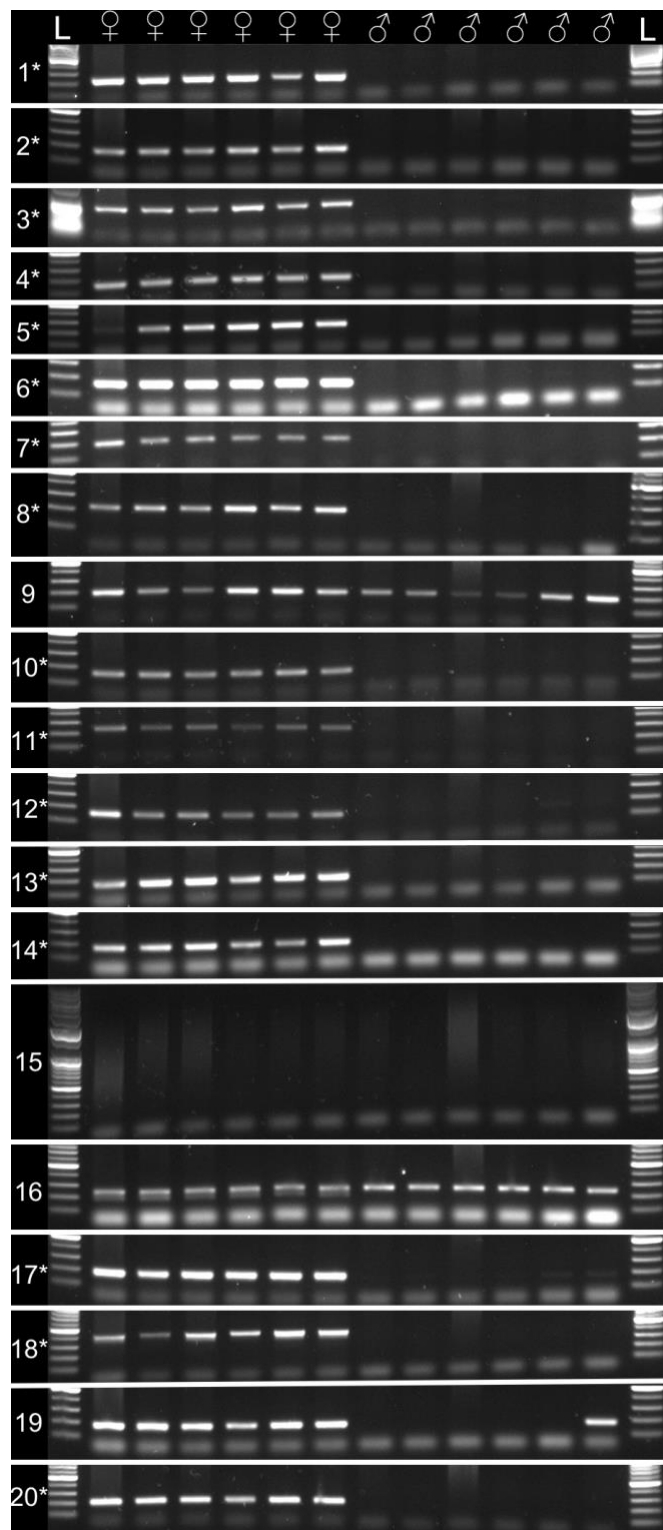

**Supplementary Figure 3. PCR validation of sex-specific fragments.**

Sample gel electrophoresis images of PCR for scaffolds determined to be sex-specific based on computational analyses. PCRs were tested on six females and six males, and

the associated lanes are denoted with ♀ and ♂, respectively. The first and last lanes are labeled with “L” to denote 100 bp ladder. Numerical labels correspond to primer information provided in Supplemental Table 3 along with the results of all PCRs tested. The images were cropped from full gel images (available in Supplemental Figure 4) to show presence/absence of fragments across individuals from multiple gel images and are separated by white lines. Those that show presence in females only are denoted with an asterisk and considered sex-specific. Also represented in this subset is an example of no amplification across any individuals (#15), amplification across all individuals (#9 and #16), and amplification across all females and 1/6 males (#19).

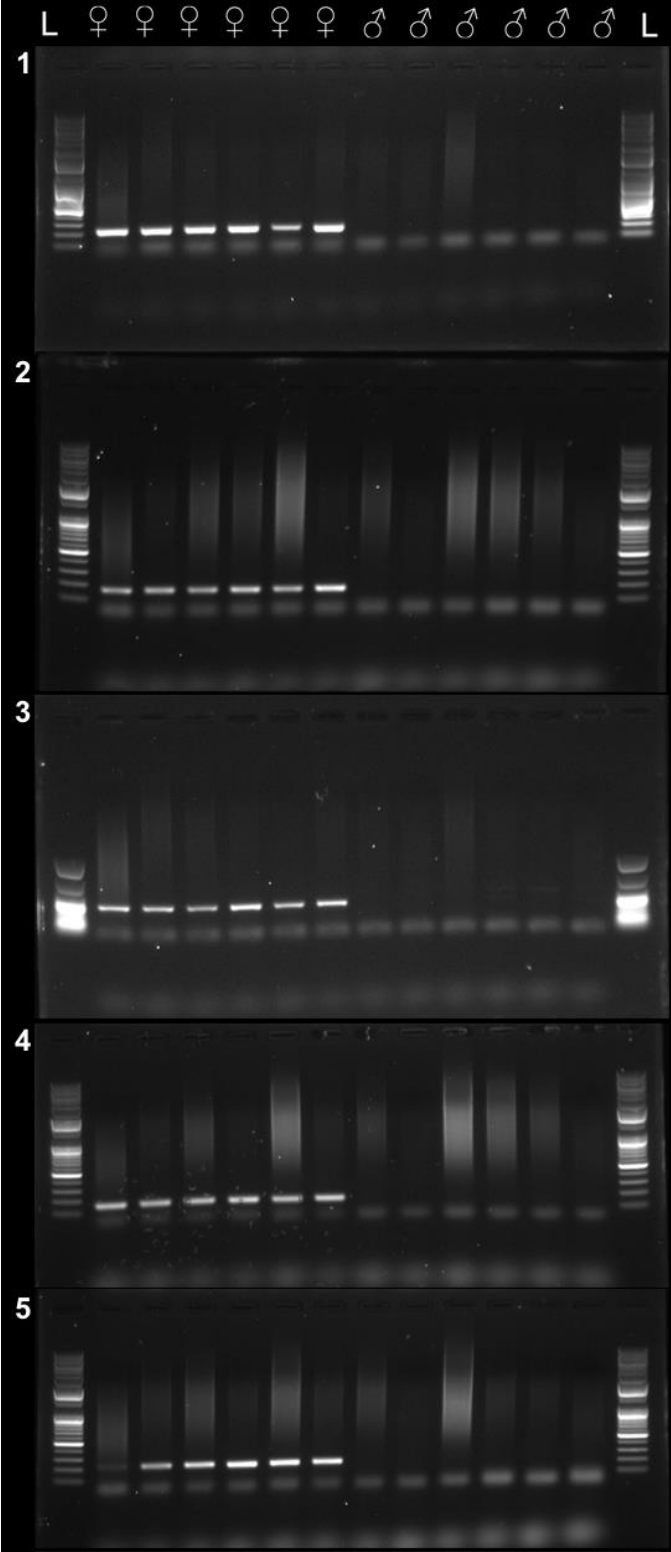

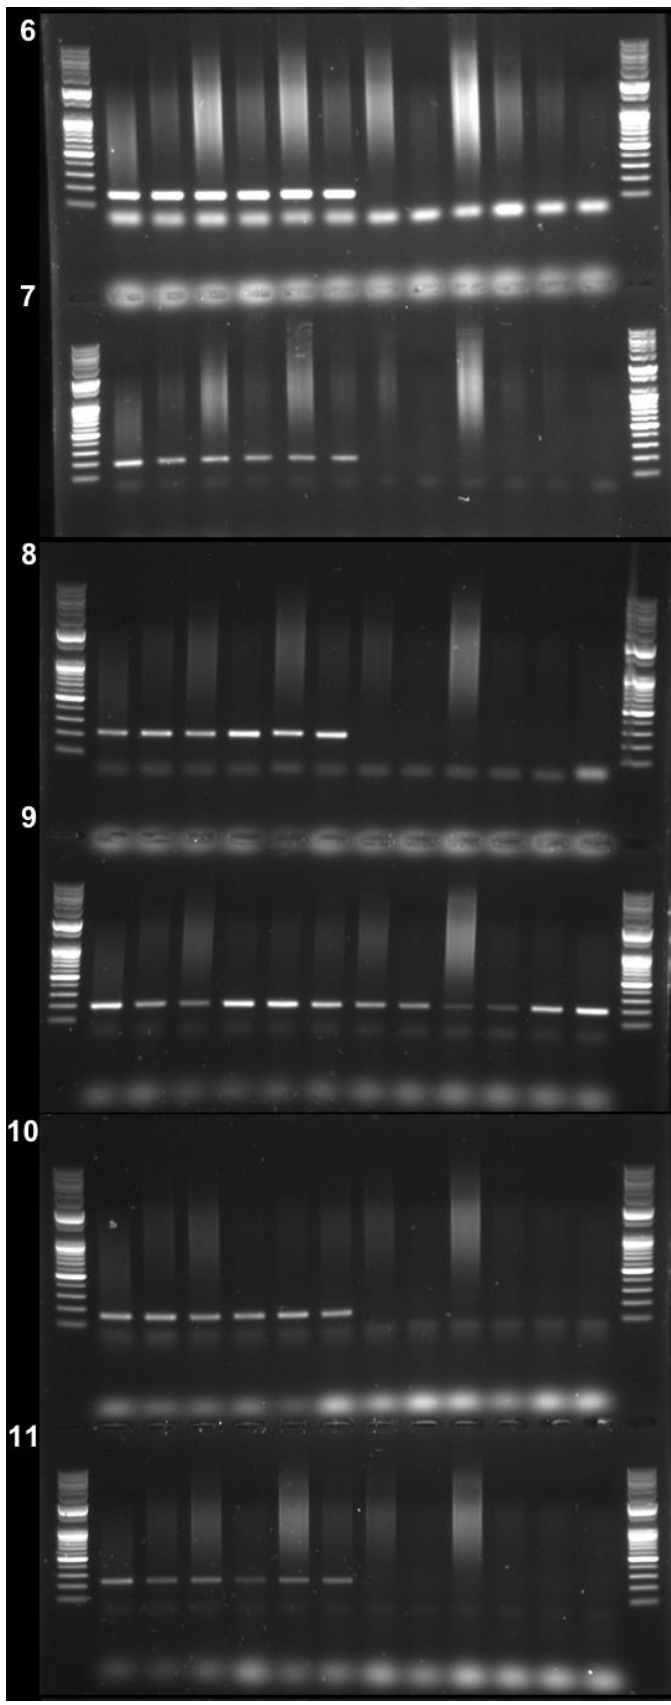

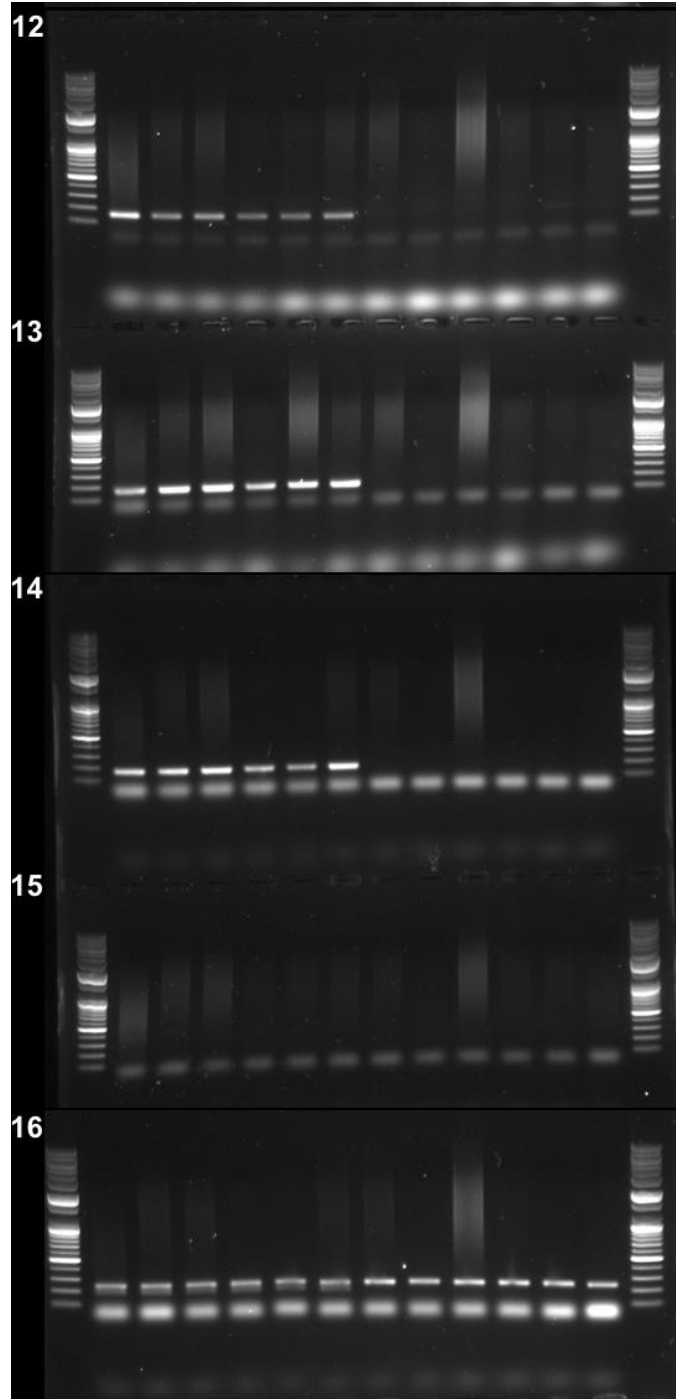



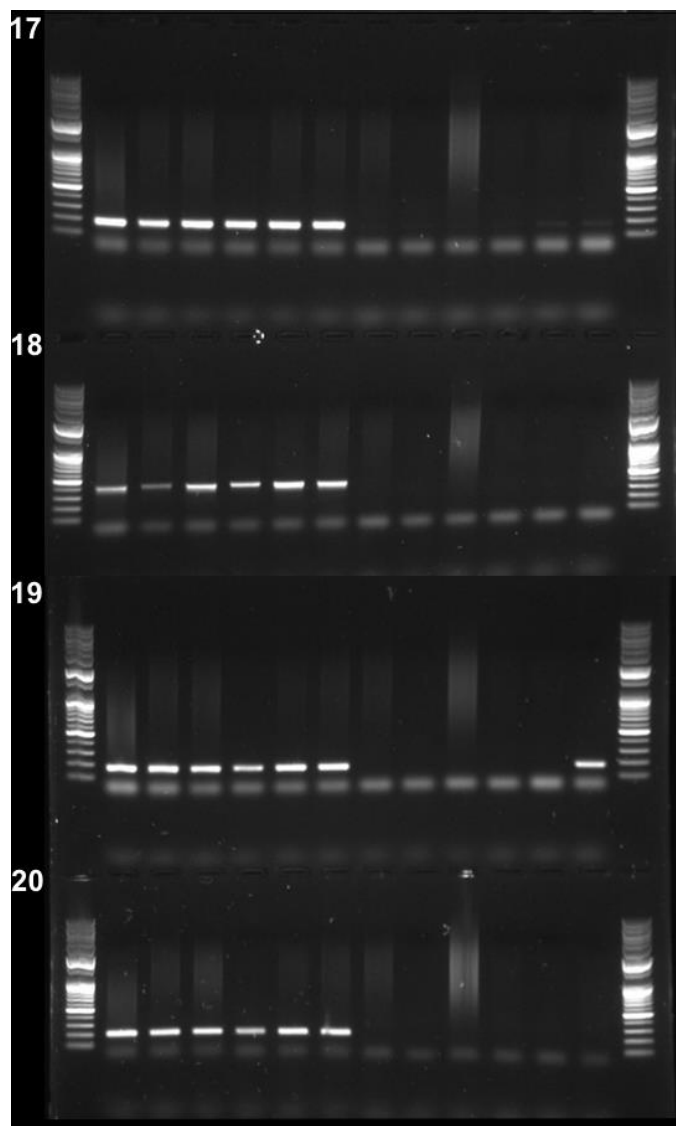

**Supplementary Figure 4. PCR validation of sex-specific fragments full-length gel images.** Full length sample gel electrophoresis images (from Supplementary Figure 3) of PCR for scaffolds determined to be sex-specific based on computational analyses. PCRs were tested on six females and six males, and the associated lanes are denoted with ♀ and ♂ above the first gel image, respectively. The first and last lanes are labeled with “L” to denote 100 bp ladder. Numerical labels correspond to primer information provided in Supplemental Table 3 along with the results of all PCRs tested. The following primer pairs were run on the same gel (top and bottom, respectively): 6&7, 8&9, 10&11, 12&13, 14&15, 17&18, and 19&20.

**Supplementary Table 1-** Coverage statistics for scaffolds that were assigned to the *Ambystoma* Z chromosome. Scaffold identifiers correspond to the published assembly.

**Supplementary Table 2-** Alignment statistics and estimated coverage ratios for regions that show enrichment in females.

**Supplementary Table 3-** Summary of PCR assays for predicted female-specific regions.
